# Supplementary material for: Flaxseed Consumption Inhibits Chemically Induced Lung Tumorigenesis and Modulates Expression of Phase II Enzymes and Inflammatory Cytokines in A/J Mice
Source: Oxford University Press journal article supplement (doi:10.1158/1940-6207.capr-17-0119), 2017-10-26
Supplement: 19406207capr170119-sup-182294_2_supp_4315798_2xf87f.docx [file 19406207capr170119-sup-182294_2_supp_4315798_2xf87f.docx]

Supplementary Table 2. List of primers for RT-qPCR

| **Gene** | **Forward sequence** | **Reverse sequence** |
| --- | --- | --- |
| *IL-1a* | 5'-GGGCTCCTCCTGTCCTGATC-3' | 5'-TCAGGTGATTTTGAACCCACG-3' |
| *IL-6* | 5'-CTTCCATCCAGTTGCCTTCTTG-3' | 5'-TGGGAGTGGTATCCTCTGTGAAGT-5' |
| *IL-8* | 5'-CTGTCCCTGTCAGCCCAGAG-3' | 5'-GCTTTTCAGCACCCGAAGG-3' |
| *IL-9* | 5'-GTGATAAGGAATGCACGATGCTC-3' | 5'-AATGATTTCAGTTTTGTTGCAATTG-3' |
| *IL-12α* | 5'-AGTTTGGCCAGGGTCATTCC-3' | 5'-TCTCTGGCCGTCTTCACCAT-3' |
| *CYP1A1* | 5'-TCTGTCACTGACACGGCTGAG-3' | 5'-GGGCCTGCTTGATGGTGTT-3' |
| *CYP2A5* | 5'-CAGGAGGCAGTCAAGGAAGC-3' | 5'-AGGCTACGCCATAGCCTTTG-3' |
| *CYP4F37* | 5'-GTGGTGACCTTGTCATGGCA-3' | 5'-CGGGAGCAGTTCTCACAGAAT-3' |
| *UGT2B34* | 5'-TCATACCCTGCGGTGATCTG-3' | 5'-GTGGGAGTCCCCCACTGTACT-3' |
| *HIF3α* | 5'-CAACAGAGCGCCACTTTTCC-3' | 5'-CTGAGCAGTGCAGCACCTTC-3' |
| *STAT1* | 5'-TTAAAAAGCTGGAGGAGTTGGAA-3' | 5'-CTGGAAGAGGAGGAAGGTTC-3' |
| *TCF21* | 5'-GGCTGGCGTCCAGCTACAT-3' | 5'-ACCATAAAGGGCCACGTCAG-3' |
| *TP63* | 5'-ATTGCCCCTCCCAGTCATCT-3' | 5'-TCATAAGGGACCAGCACGCT-3' |
| *EIF4E3* | 5'-TGTTAGCGACCATTGGAGAGC-3' | 5'-CTGGACGACATCCTCTCGGT-3' |
| *Mb* | 5'-ACCGCCATCTGTCCGAGTAG-3' | 5'-TGGTCACATCCGCTGGATAG-3' |
| *EGLN3* | 5'-TTCCTCCTGTCCCTCATCGA-3' | 5'-TGGATAGCAAGCCACCATTG-3' |
| *NEFL* | 5'-ATCGCTTCGCCAGCTTCAT-3' | 5'-CGGGAAGGCTCAGAGTGTTTC-3' |
| *CAM2K* | 5'-TTGGGTATCCCCCGTTCTG-3' | 5'-GGTGACGGTGTCCCATTCTG-3' |
| *SPTB* | 5'-CCCCGAGGAGTTTCGAGATT-3' | 5'-CCAAACACGGTGTACAAGTCCA-3' |
| *PP2R* | 5'-CGGGTCGTAATATTTCAGCGA-3' | 5'-AACTCGGGTTCATGGCTCTG-3' |
